# Supplementary material for: Exploring the Frontier of Semiconductor Technologies: Innovations, Sustainability and Future Opportunities—A Review
Source: Preprints.org preprint supplement (doi:10.20944/preprints202409.1307.v1), 2024-09-17
Supplement: Supplementary file 1 [file supplementary]

 Evolution of semiconductors from basic transistors to advanced graphene technologies.

 Key semiconductor materials properties and their impact on device performance.

 Industry challenges: material constraints, manufacturing complexities, environmental impacts.

 Sustainability in semiconductors: innovations for reducing environmental footprint.

 Future research directions: opportunities in semiconductor technology advancements.
